# Supplementary material for: Education: DNA replication using microscale natural convection
Source: Royal Society of Chemistry journal article supplement (doi:10.1039/c2lc40760d), 2012-01-01

## Application of computational fluid dynamics in determining the internal convective flow patterns in Rayleigh Bénard convective cells

**Aim:** To simulate and analyze the steady state convective flow field of water within a Rayleigh Bénard cylindrical cell of a given geometry and thermal boundary conditions.

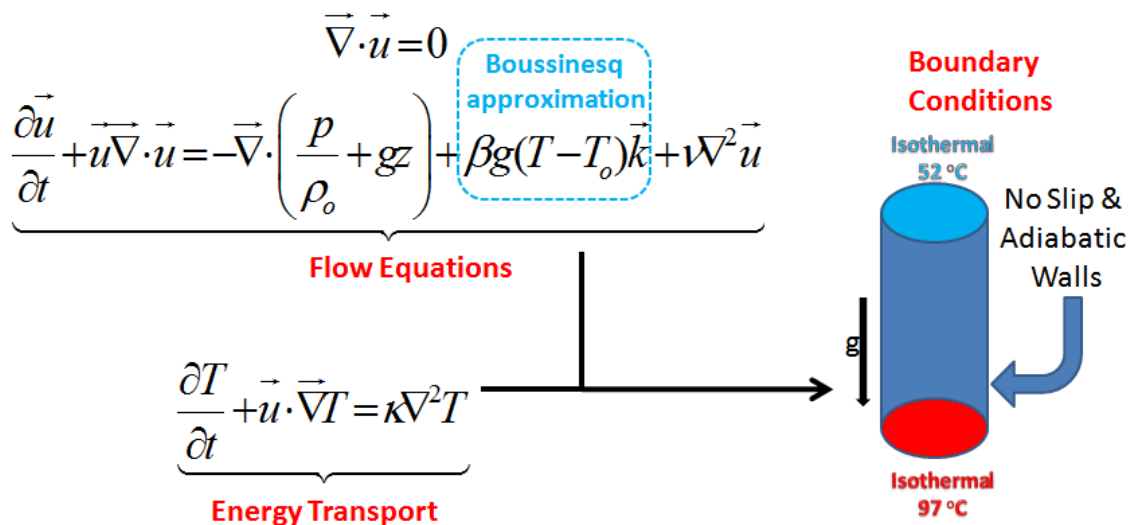

| Asp | Ra       | Height (m) | Diameter (m) |
|-----|----------|------------|--------------|
| 4   | 2.50E+05 | 0.0009635  | 0.00024088   |
| 4   | 2000000  | 0.00192701 | 0.00048175   |
| 4   | 9000000  | 0.00318142 | 0.00079536   |

1. Determine the steady state flow field and temperature profiles for each of the 3 geometries assigned to you.
2. Verify that the velocity profiles maps correctly on the Rayleigh number- aspect ratio parametric space.

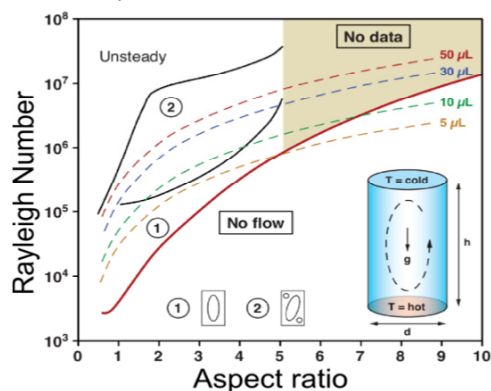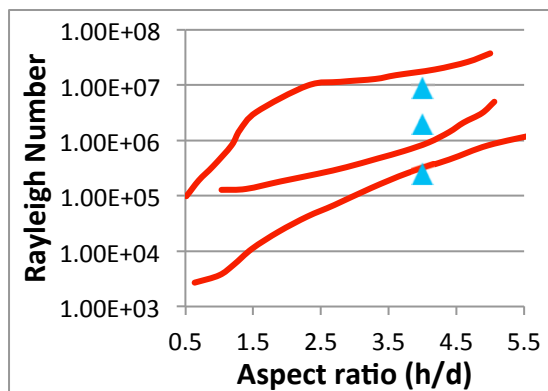

Supplement: c2lc40760d.pdf [file c2lc40760d.pdf]
